# Supplementary material for: Modulated Laser Cladding of Implant-Type Coatings by Bovine-Bone-Derived Hydroxyapatite Powder Injection on Ti6Al4V Substrates—Part I: Fabrication and Physico-Chemical Characterization
Source: MDPI journal article supplement (doi:10.3390/ma15227971), 2022-11-11
Supplement: s1 [file s1]

## Supplementary materials

### FIGURES

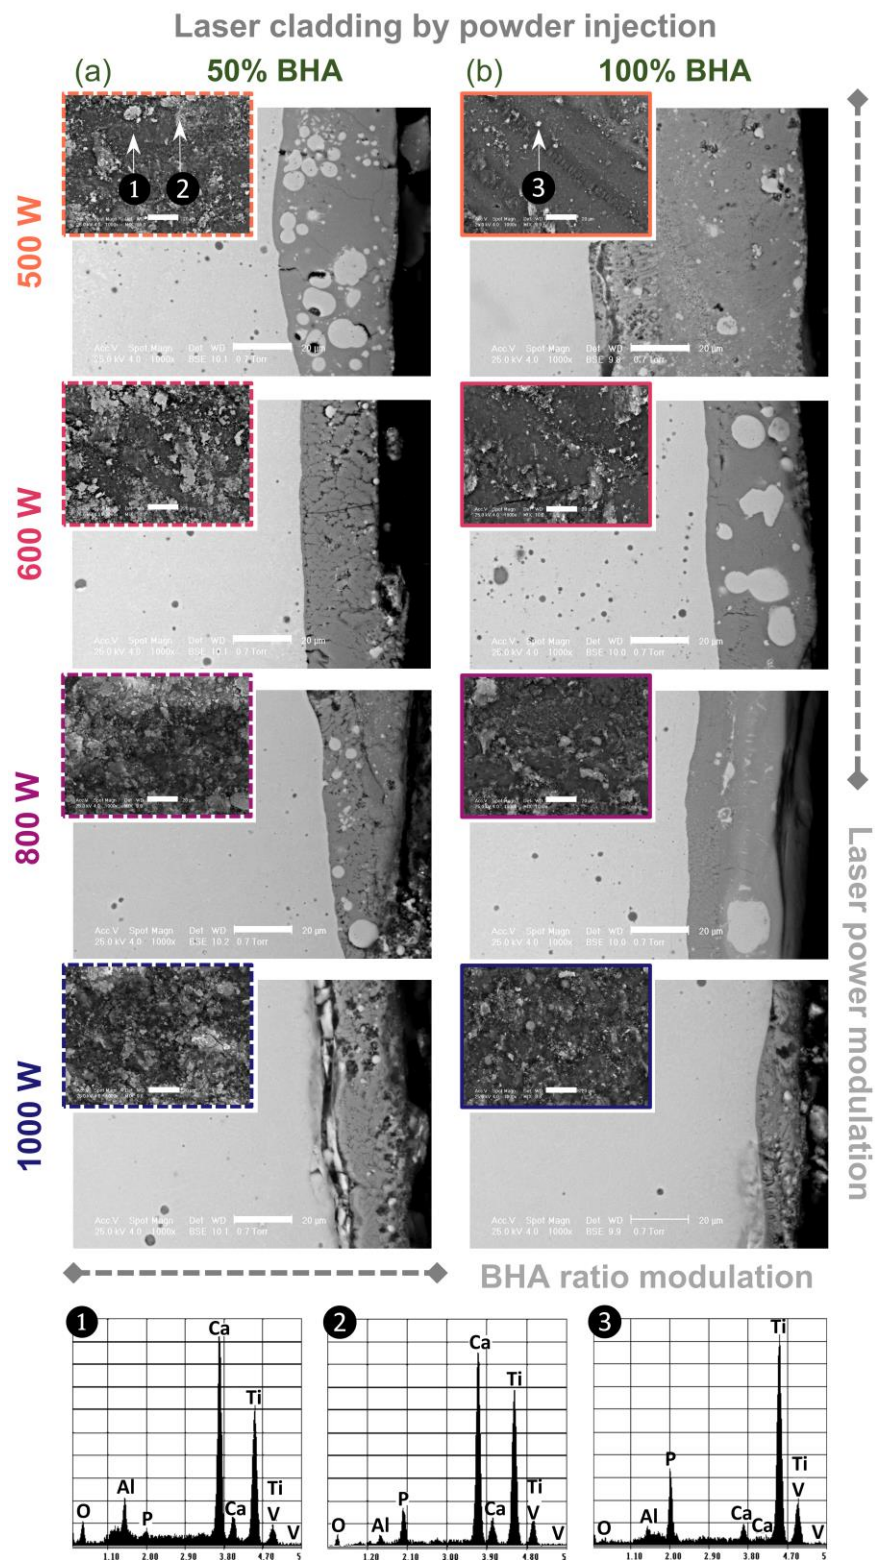

**Figure S1.** SEM morphological evaluation of the laser cladded samples deposited using BHA powder contents of (a) 50 and (b) 100 wt.% at the four beam powers. Main image: cross-section view. Inset images: surface top-view. Scale bar: 20  $\mu\text{m}$ .
